# Supplementary material for: A procession of metabolic alterations accompanying muscle senescence in Manduca sexta
Source: PubMed Central journal article supplement (PMC5772441; doi:10.1038/s41598-018-19630-5), 2018-01-17
Supplement: 41598_2018_19630_MOESM1_ESM.pdf [file 41598_2018_19630_MOESM1_ESM.pdf]

## **SUPPLEMENTARY MATERIAL**

### **A procession of metabolic alterations accompanying muscle senescence in *Manduca sexta***

Bernard W. M. Wone\*, Jason M. Kinchen, Elana R. Kaup, Beate Wone

\*Correspondence and requests for materials should be addressed to B.W.M.W. (email: [b.wone10@gmail.com](mailto:b.wone10@gmail.com))

**a**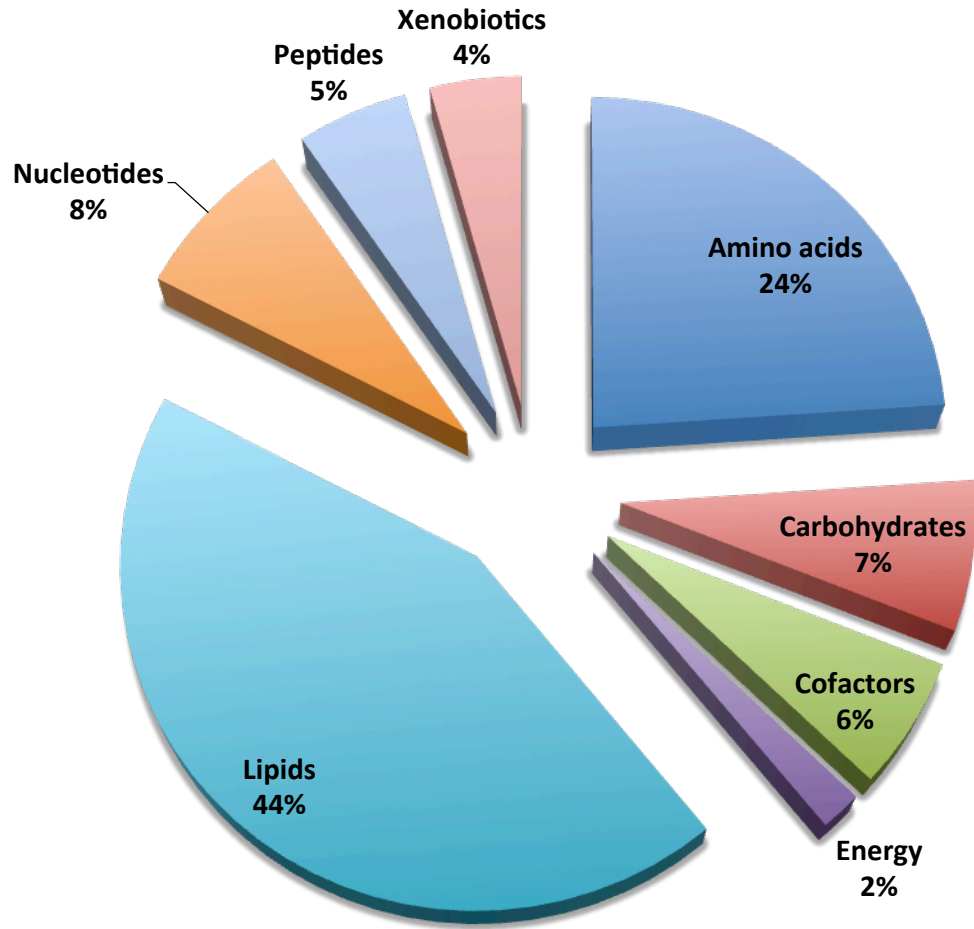**b**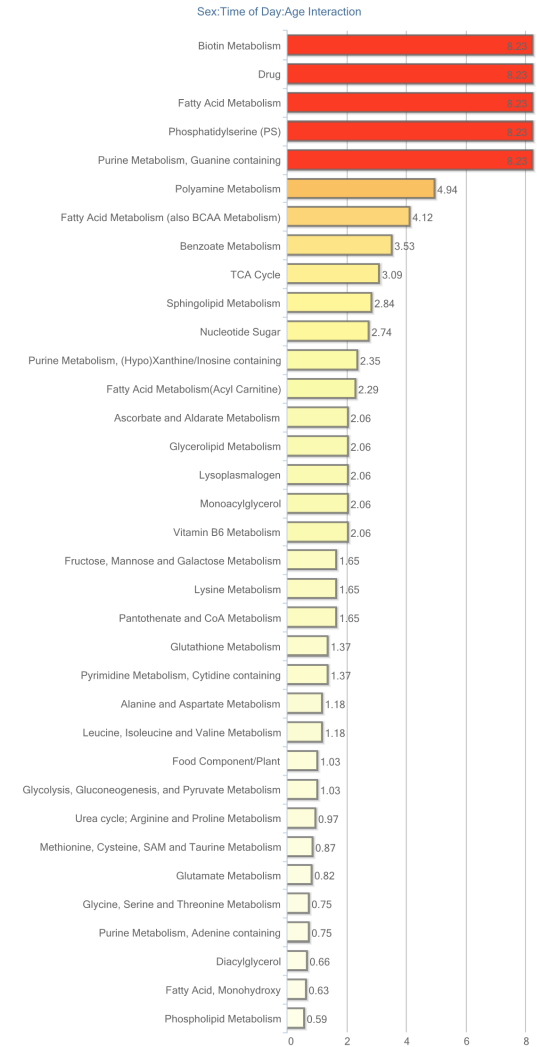

**Figure S1. Global metabolome of flight muscle in senescing *Manduca sexta*.** (a) Functional categorization of 535 identified metabolites detected across Diel Time from middle to advanced Age. (b) Metabolic pathways that were significantly enriched ( $P < 0.05$ ).

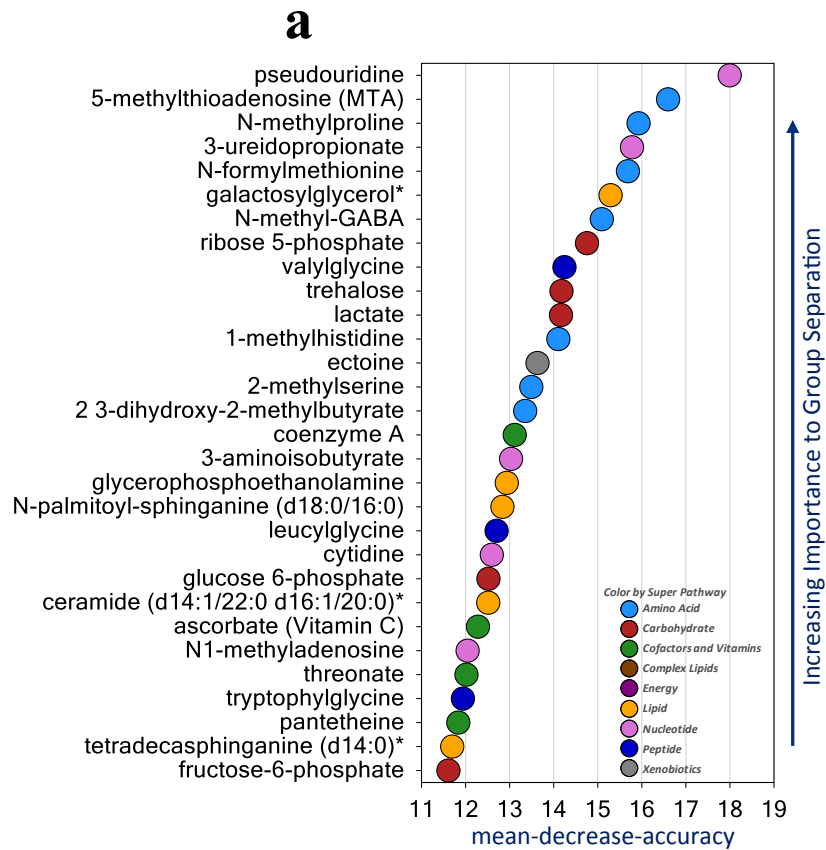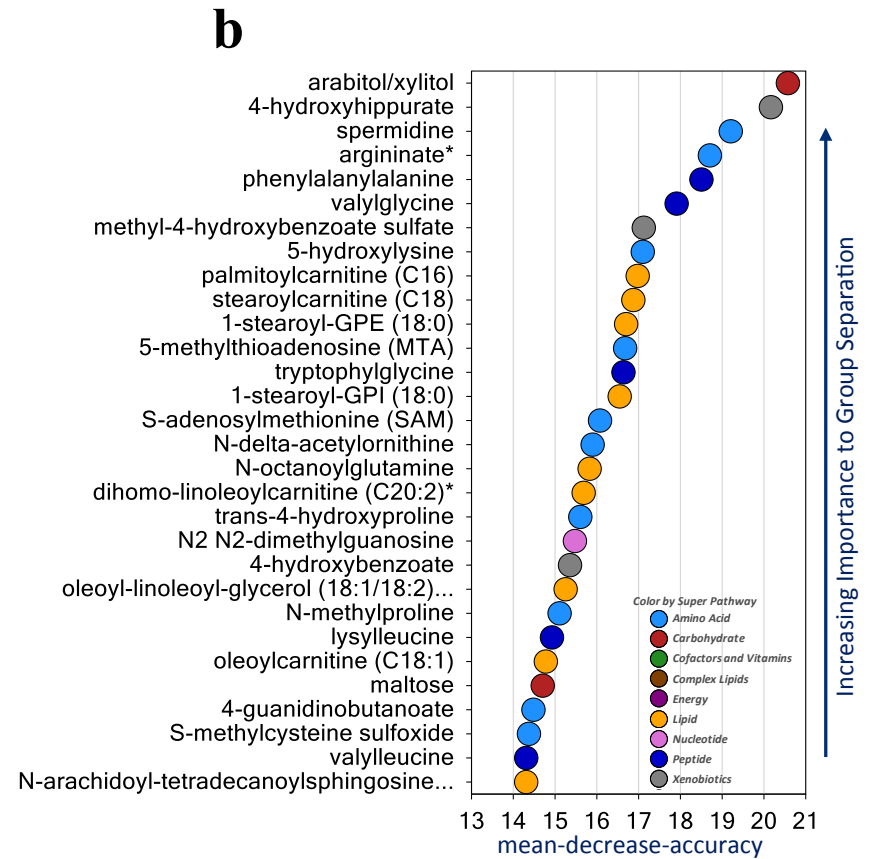

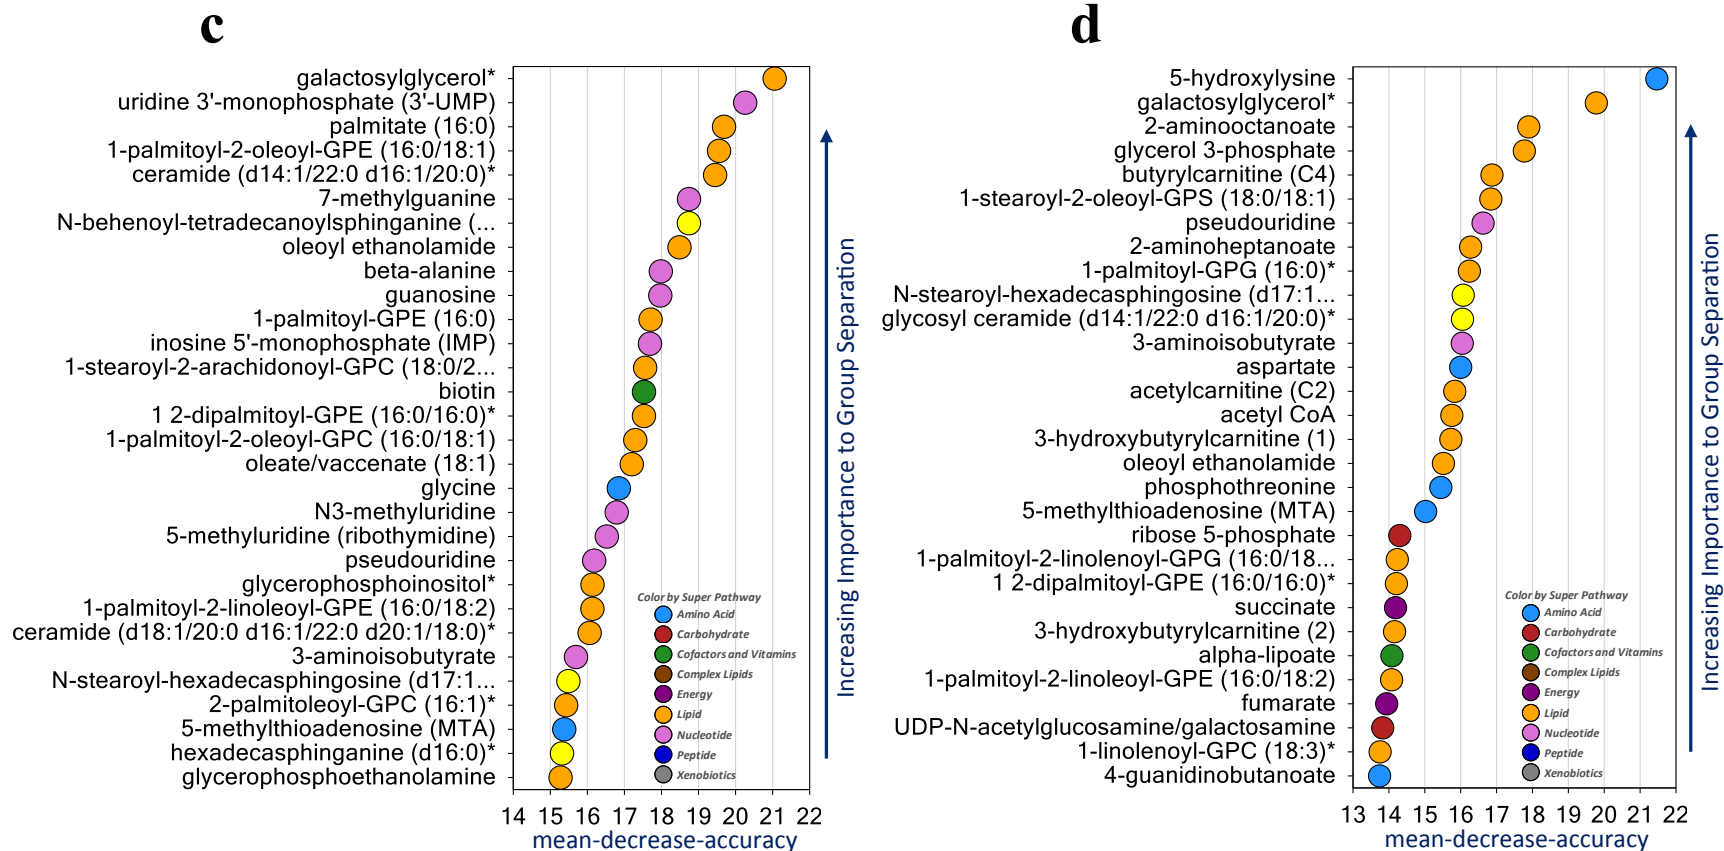

**Figure S2. Identification of biomarkers for muscle aging by Random Forest Analysis of global metabolites in flight muscle of senescing *Manduca sexta*.** These biochemical importance plots indicate the rankings of metabolites based on their increasing importance to group separation according to Age. We list the 30 most important metabolites to group separation according to Age and their cumulative predictive accuracy. Female: (a) Day gave a predictive accuracy of 50%; (b) Night gave a predictive accuracy of 80%. Male (c) Day gave a predictive accuracy of 75%; (d) Night gave a predictive accuracy of 60%. Colored symbols are used to indicate the super pathway to which the respective metabolite belongs. \*Indicates compounds that have not been officially confirmed based on a standard but we are confident in its identity.

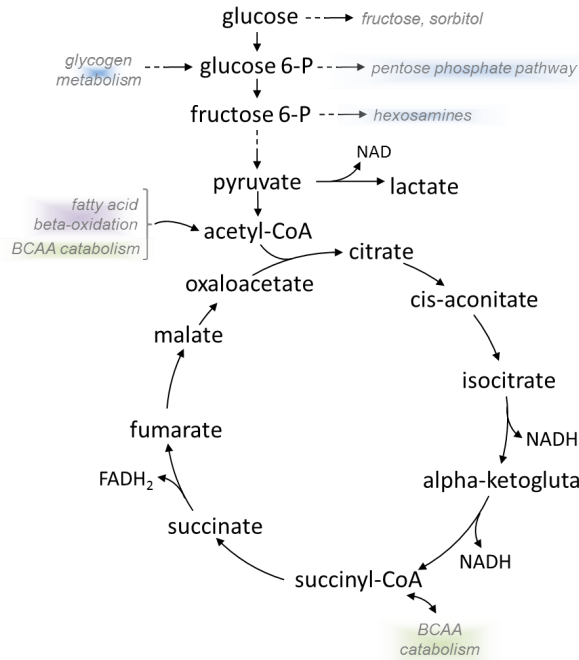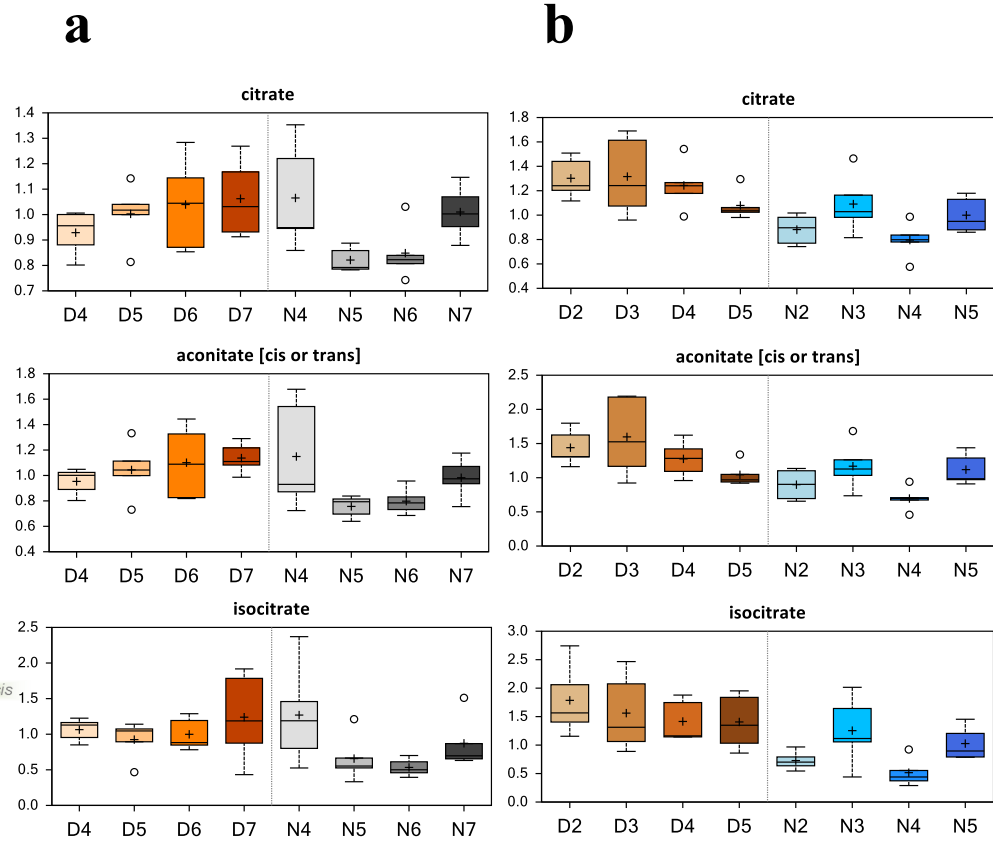

**Figure S3. Differences in the abundances of metabolites involved in energy metabolism in flight muscle of *Manduca sexta* across Diel Time and Age. (a) Female, (b) Male.** The *x*-axis represents age post-eclosion at Day (D) and Night (N). The *y*-axis box plots indicate the scaled intensity mean (+) and median (-) values: upper and lower ranges of boxes indicate upper and lower quartiles, respectively; upper and lower whiskers indicate the maximum and minimum distributions of the data; small circles represent outlying data points. The adjusted *P* values for the significant comparisons are presented in Tables S1 and S2.

**a**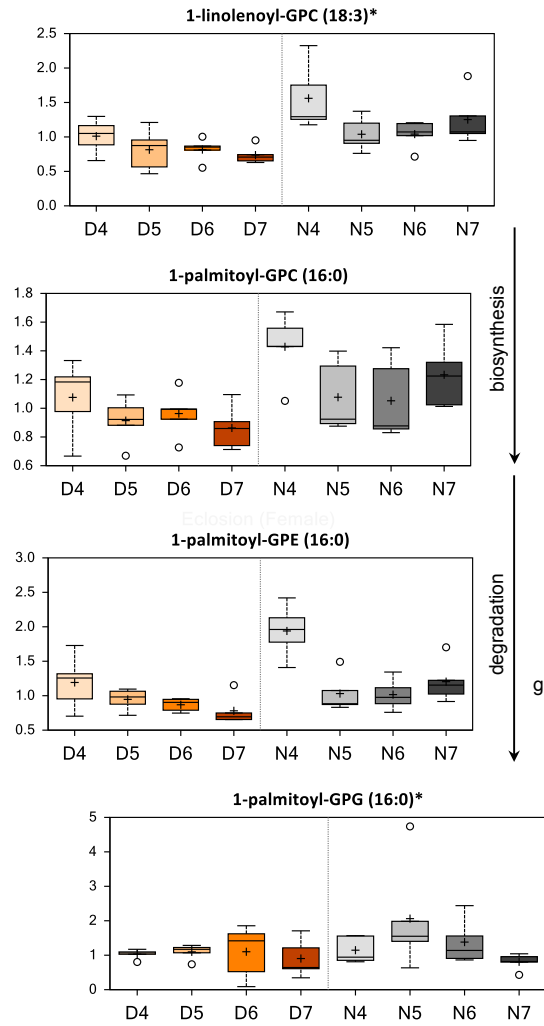**b**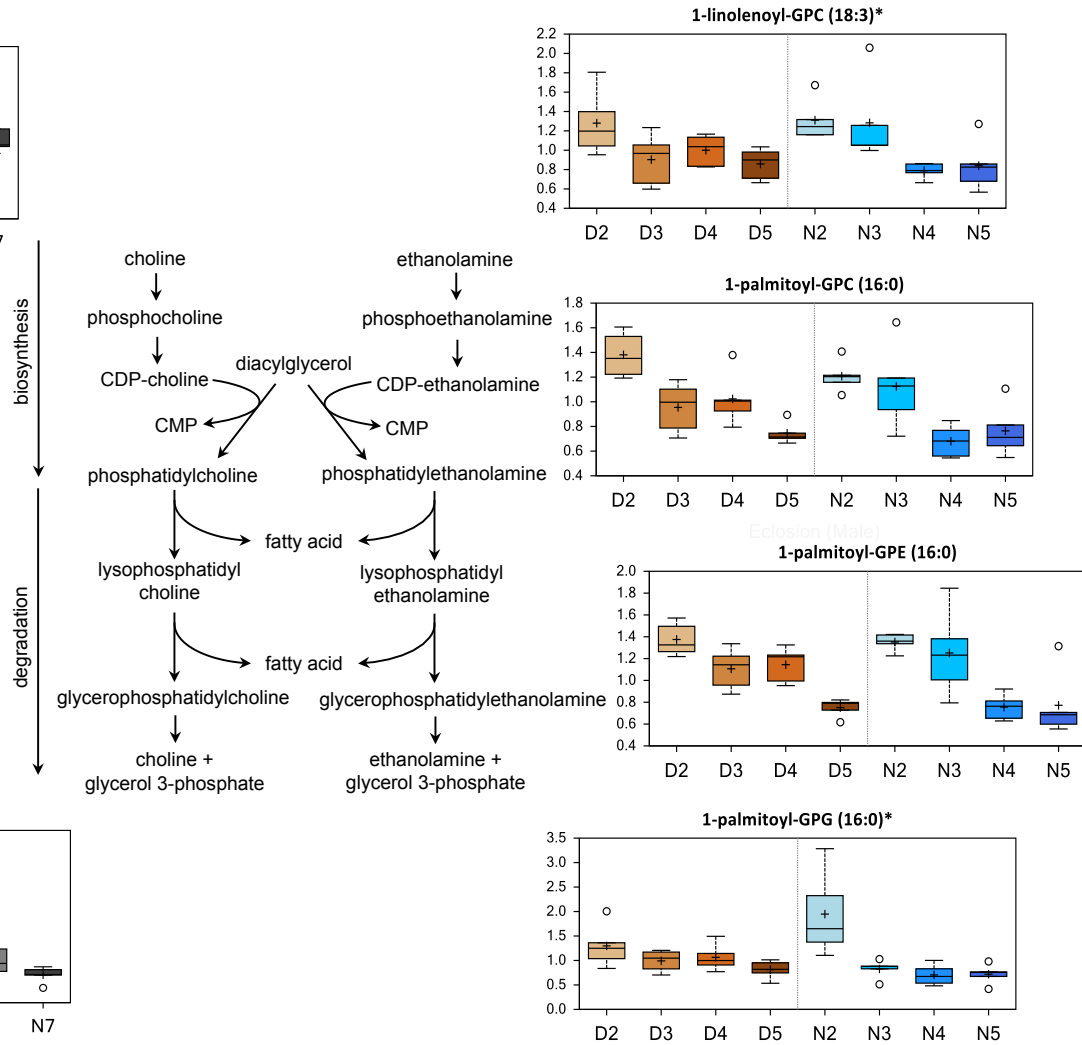

**Figure S4. Differences in lysolipid abundances in flight muscle of *Manduca sexta* across Diel Time and Age.** (a) Female, (b) Male. Not all significant lysolipids are shown; see Tables S1 and S2 for complete list. The x-axis represents age post-eclosion at Day (D) and Night (N). The y-axis box plots indicate the scaled intensity mean (+) and median (–) values: upper and lower ranges of boxes indicate upper and lower quartiles, respectively; upper and lower whiskers indicate the maximum and minimum distributions of the data; small circles represent outlying data points. The adjusted *P* values for the significant comparisons are presented in Tables S1 and S2. \*Indicates compound that has not been officially confirmed based on a standard, but for which we are confident of the identity.



**a**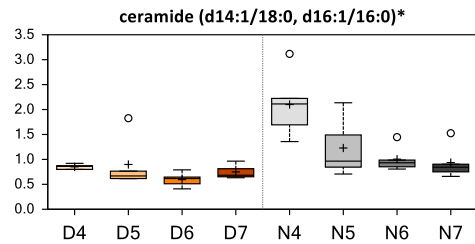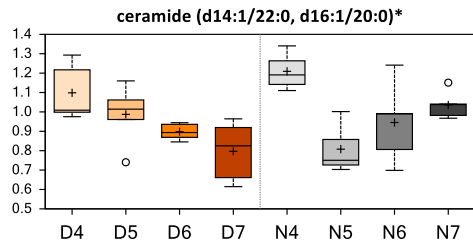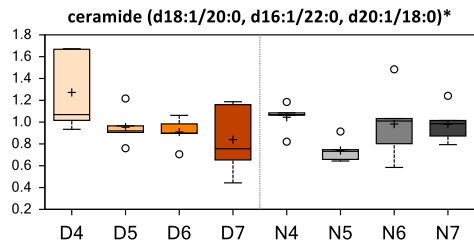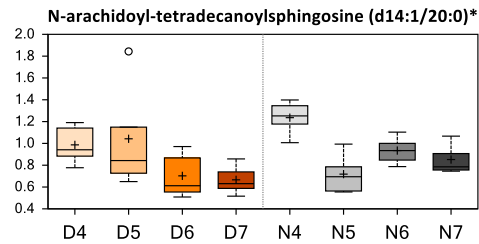**b**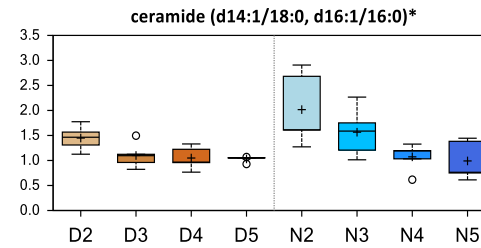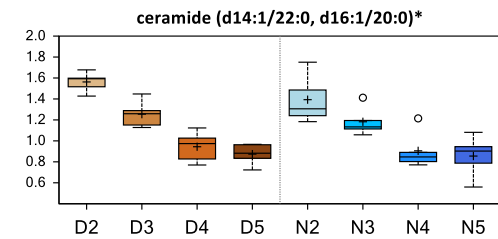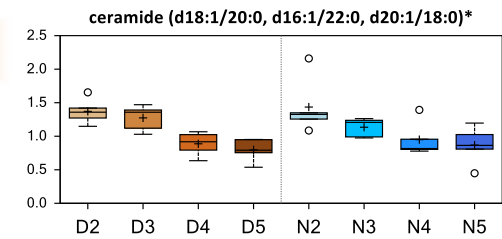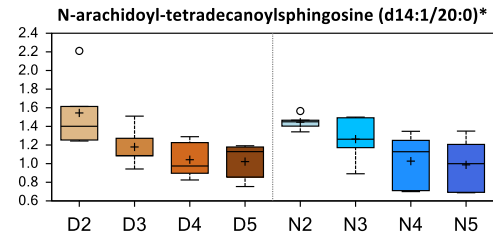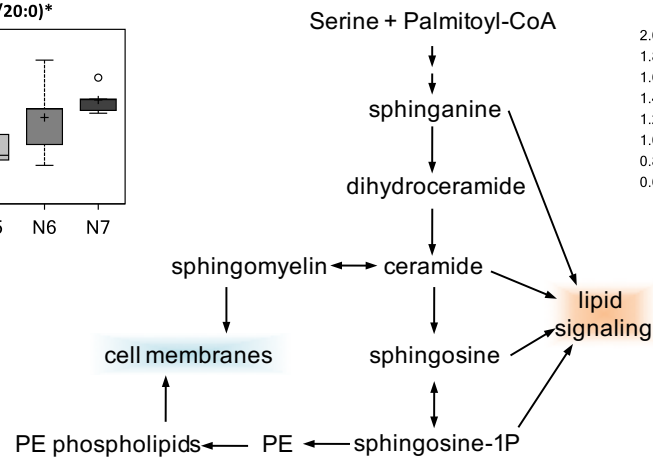

**Figure S5. Differences in sphingolipid and ceramide abundances in flight muscle of *Manduca sexta* across Diel Time and Age.** (a) Female, (b) Male. Not all significant sphingolipids are shown; see Tables S1 and S2 for complete list. The *x*-axis represents age post-eclosion at Day (D) and Night (N). The *y*-axis box plots indicate the scaled intensity mean (+) and median (–) values; upper and lower ranges of boxes indicate upper and lower quartiles, respectively; upper and lower whiskers indicate the maximum and minimum distributions of the data; small circles represent outlying data points. The adjusted *P* values for the significant comparisons are presented in Tables S1 and S2. \*Indicates compound that has not been officially confirmed based on a standard, but for which we are confident of the identity.

**a**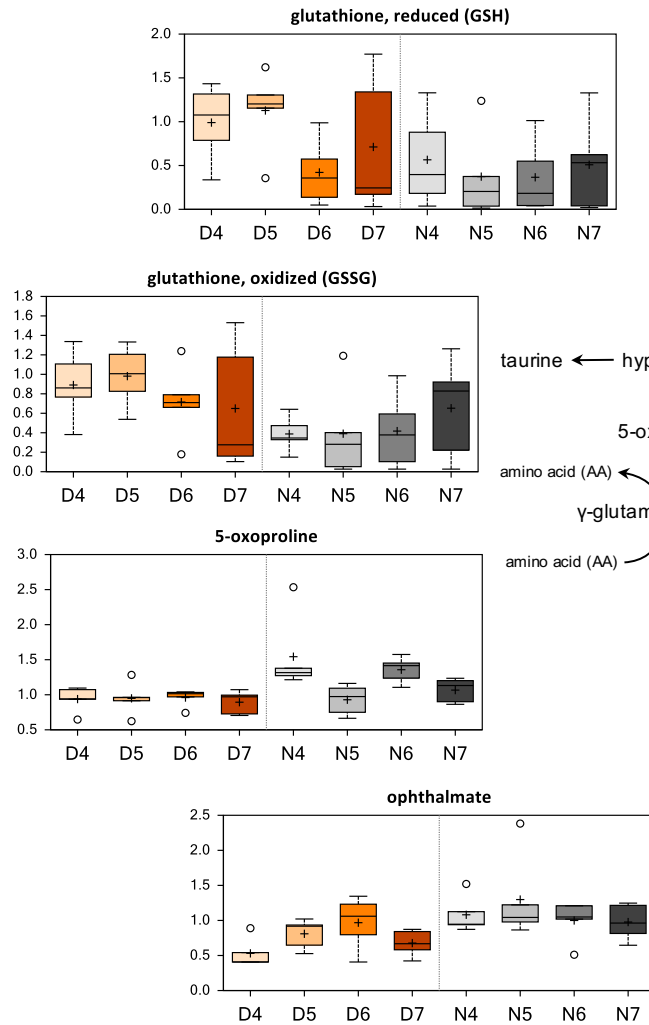**b**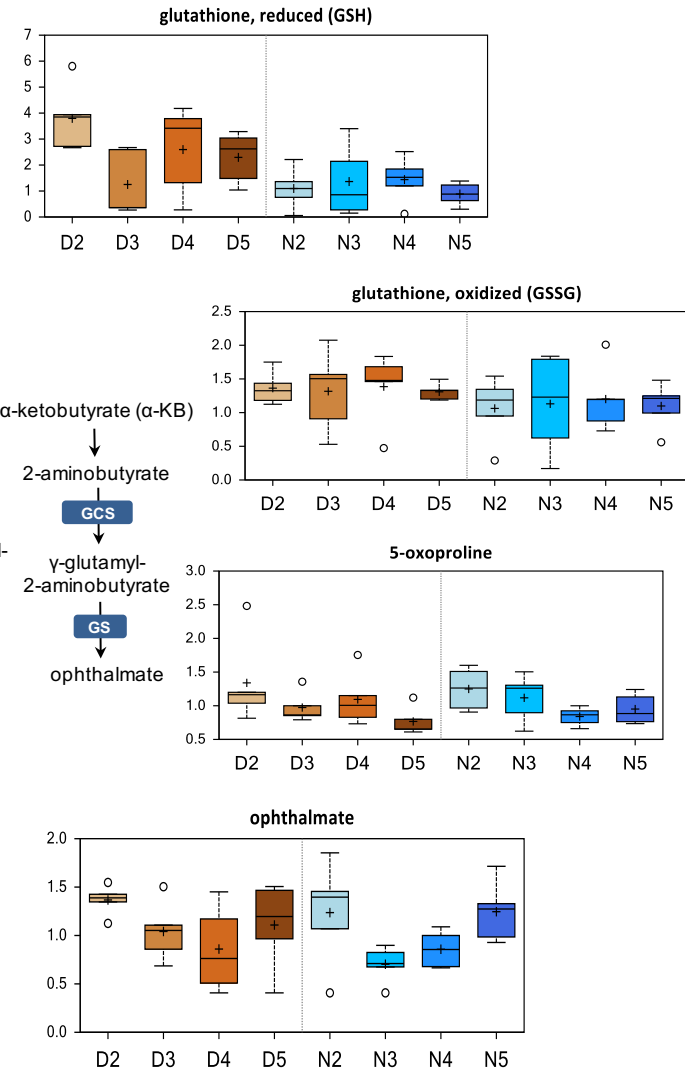

**Figure S6. Differences in the abundances of metabolites involved in glutathione metabolism in flight muscle of *Manduca sexta* across Diel Time and Age. (a) Female, (b) Male.** The *x*-axis represents age post-eclosion at Day (D) and Night (N). The *y*-axis box plots indicate the scaled intensity mean (+) and median (–) values: upper and lower ranges of boxes indicate upper and lower quartiles, respectively; upper and lower whiskers indicate the maximum and minimum distributions of the data; small circles represent outlying data points. The adjusted *P* values for the significant comparisons are presented in Tables S1 and S2.

**Table S1.** Metabolite abundances significantly changed in flight muscle of female *Manduca sexta* across Diel Time (adjusted *P* vales) and Age (adjusted *P* vales).

| Biochemical                    | Super Pathway | Sub Pathway                                      | Diel Time  | Age        | Interaction |
|--------------------------------|---------------|--------------------------------------------------|------------|------------|-------------|
| carboxyethyl-GABA              | Amino Acid    | Glutamate Metabolism                             | 0.049799   | 0.031401   | 0.76582     |
| glutamine                      | Amino Acid    | Glutamate Metabolism                             | 0.00065014 | 0.403      | 0.45242     |
| N-acetylglutamine              | Amino Acid    | Glutamate Metabolism                             | 0.0010204  | 0.27076    | 0.67318     |
| 5-oxoproline                   | Amino Acid    | Glutathione Metabolism                           | 0.013372   | 0.22411    | 0.42003     |
| ophthalmate                    | Amino Acid    | Glutathione Metabolism                           | 0.01945    | 0.5067     | 0.65333     |
| N-acetylglycine                | Amino Acid    | Glycine, Serine and Threonine Metabolism         | 0.0024194  | 0.25474    | 0.66506     |
| N-acetylserine                 | Amino Acid    | Glycine, Serine and Threonine Metabolism         | 0.049799   | 0.51779    | 0.76675     |
| 1-methylhistidine              | Amino Acid    | Histidine Metabolism                             | 0.6685     | 0.025967   | 0.45192     |
| 1-methylimidazoleacetate       | Amino Acid    | Histidine Metabolism                             | 0.81553    | 0.048871   | 0.49335     |
| 3-methylhistidine              | Amino Acid    | Histidine Metabolism                             | 0.0007273  | 0.48717    | 0.45024     |
| N-acetylhistidine              | Amino Acid    | Histidine Metabolism                             | 0.0089421  | 0.84598    | 0.52691     |
| ethylmalonate                  | Amino Acid    | Leucine, Isoleucine and Valine Metabolism        | 0.013372   | 0.67231    | 0.87193     |
| N-acetylisoleucine             | Amino Acid    | Leucine, Isoleucine and Valine Metabolism        | 0.0065931  | 0.38888    | 0.6373      |
| N-acetylleucine                | Amino Acid    | Leucine, Isoleucine and Valine Metabolism        | 0.0095392  | 0.33641    | 0.60154     |
| N-acetylvaline                 | Amino Acid    | Leucine, Isoleucine and Valine Metabolism        | 0.00098031 | 0.28677    | 0.42003     |
| 5-(galactosylhydroxy)-L-lysine | Amino Acid    | Lysine Metabolism                                | 0.67811    | 0.011837   | 0.45242     |
| 5-hydroxylysine                | Amino Acid    | Lysine Metabolism                                | 0.8684     | 8.1354E-06 | 0.67766     |
| 2-aminobutyrate                | Amino Acid    | Methionine, Cysteine, SAM and Taurine Metabolism | 0.4265     | 0.031401   | 0.29311     |
| cysteine sulfinic acid         | Amino Acid    | Methionine, Cysteine, SAM and Taurine Metabolism | 0.027646   | 0.16323    | 0.45242     |
| N-formylmethionine             | Amino Acid    | Methionine, Cysteine, SAM and Taurine Metabolism | 0.53727    | 0.0094609  | 0.60681     |
| S-adenosylhomocysteine (SAH)   | Amino Acid    | Methionine, Cysteine, SAM and Taurine Metabolism | 0.030129   | 0.27441    | 0.80184     |

|                                                  |                        |                                                  |            |            |          |
|--------------------------------------------------|------------------------|--------------------------------------------------|------------|------------|----------|
| S-adenosylmethionine (SAM)                       | Amino Acid             | Methionine, Cysteine, SAM and Taurine Metabolism | 0.0075507  | 8.1354E-06 | 0.076388 |
| S-methylcysteine sulfoxide                       | Amino Acid             | Methionine, Cysteine, SAM and Taurine Metabolism | 0.23814    | 0.00046907 | 0.41263  |
| 5-methylthioadenosine (MTA)                      | Amino Acid             | Polyamine Metabolism                             | 0.85679    | 1.7536E-06 | 0.19957  |
| putrescine                                       | Amino Acid             | Polyamine Metabolism                             | 0.00011652 | 0.41304    | 0.55405  |
| N-methylproline                                  | Amino Acid             | Urea cycle; Arginine and Proline Metabolism      | 0.77607    | 0.0059597  | 0.78083  |
| N-acetyl-glucosamine 1-phosphate                 | Carbohydrate           | Aminosugar Metabolism                            | 0.69306    | 0.0094609  | 0.76613  |
| galactonate                                      | Carbohydrate           | Fructose, Mannose and Galactose Metabolism       | 0.0089421  | 0.20027    | 0.20365  |
| mannose                                          | Carbohydrate           | Fructose, Mannose and Galactose Metabolism       | 0.037906   | 0.92288    | 0.56818  |
| sedoheptulose                                    | Carbohydrate           | Pentose Metabolism                               | 0.038608   | 0.011543   | 0.14221  |
| alpha-lipoate                                    | Cofactors and Vitamins | Lipoate Metabolism                               | 0.010133   | 0.68379    | 0.90538  |
| nicotinate                                       | Cofactors and Vitamins | Nicotinate and Nicotinamide Metabolism           | 0.17154    | 0.04186    | 0.6383   |
| ceramide (d14:1/22:0, d16:1/20:0)*               | Lipid                  | Ceramides                                        | 0.39394    | 0.0089559  | 0.22261  |
| diacylglycerol (16:1/18:2 [2], 16:0/18:3 [1])*   | Lipid                  | Diacylglycerol                                   | 0.00013111 | 0.2861     | 0.6373   |
| linoleoyl-arachidonoyl-glycerol (18:2/20:4) [2]* | Lipid                  | Diacylglycerol                                   | 0.028882   | 0.30026    | 0.66846  |
| linoleoyl-linolenoyl-glycerol (18:2/18:3) [1]*   | Lipid                  | Diacylglycerol                                   | 0.0010421  | 0.035738   | 0.98362  |
| linoleoyl-linolenoyl-glycerol (18:2/18:3) [2]*   | Lipid                  | Diacylglycerol                                   | 0.00013111 | 0.30569    | 0.57876  |
| linoleoyl-linoleoyl-glycerol (18:2/18:2) [1]*    | Lipid                  | Diacylglycerol                                   | 0.00031998 | 0.068536   | 0.39821  |
| linoleoyl-linoleoyl-glycerol (18:2/18:2) [2]*    | Lipid                  | Diacylglycerol                                   | 0.0020905  | 0.43458    | 0.62912  |
| myristoyl-linoleoyl-glycerol (14:0/18:2) [1]*    | Lipid                  | Diacylglycerol                                   | 0.0013126  | 0.46307    | 0.7791   |
| oleoyl-linolenoyl-glycerol (18:1/18:3) [2]*      | Lipid                  | Diacylglycerol                                   | 0.00013111 | 0.19796    | 0.65333  |

|                                                  |       |                                              |             |           |           |
|--------------------------------------------------|-------|----------------------------------------------|-------------|-----------|-----------|
| oleoyl-linoleoyl-glycerol (18:1/18:2) [1]        | Lipid | Diacylglycerol                               | 0.011086    | 0.26347   | 0.58404   |
| oleoyl-linoleoyl-glycerol (18:1/18:2) [2]        | Lipid | Diacylglycerol                               | 0.00054397  | 0.060875  | 0.41486   |
| palmitoleoyl-linoleoyl-glycerol (16:1/18:2) [1]* | Lipid | Diacylglycerol                               | 0.00010926  | 0.18629   | 0.52691   |
| palmitoyl-linolenoyl-glycerol (16:0/18:3) [2]*   | Lipid | Diacylglycerol                               | 0.015094    | 0.5067    | 0.70895   |
| palmitoyl-linoleoyl-glycerol (16:0/18:2) [2]*    | Lipid | Diacylglycerol                               | 0.0062092   | 0.020623  | 0.45242   |
| palmitoyl-oleoyl-glycerol (16:0/18:1) [1]*       | Lipid | Diacylglycerol                               | 0.0089421   | 0.0089559 | 0.45242   |
| palmitoyl-oleoyl-glycerol (16:0/18:1) [2]*       | Lipid | Diacylglycerol                               | 0.011086    | 0.0047047 | 0.19957   |
| stearoyl-linoleoyl-glycerol (18:0/18:2) [2]*     | Lipid | Diacylglycerol                               | 0.062262    | 0.0222    | 0.55156   |
| linoleoylcholine*                                | Lipid | Fatty Acid Metabolism (Acyl Choline)         | 0.00013111  | 0.34827   | 0.55156   |
| oleoylcholine                                    | Lipid | Fatty Acid Metabolism (Acyl Choline)         | 0.00045655  | 0.16317   | 0.6815    |
| butyrylcarnitine (C4)                            | Lipid | Fatty Acid Metabolism (also BCAA Metabolism) | 0.025806    | 0.53098   | 0.66506   |
| 3-hydroxybutyrylcarnitine (2)                    | Lipid | Fatty Acid Metabolism(Acyl Carnitine)        | 0.0036007   | 0.0094609 | 0.60681   |
| acetylcarnitine (C2)                             | Lipid | Fatty Acid Metabolism(Acyl Carnitine)        | 0.024941    | 0.59396   | 0.076388  |
| arachidoylcarnitine (C20)*                       | Lipid | Fatty Acid Metabolism(Acyl Carnitine)        | 0.000087389 | 0.096351  | 0.25021   |
| behenoylcarnitine (C22)*                         | Lipid | Fatty Acid Metabolism(Acyl Carnitine)        | 0.0063505   | 0.0056262 | 0.55156   |
| dihomo-linoleoylcarnitine (C20:2)*               | Lipid | Fatty Acid Metabolism(Acyl Carnitine)        | 0.050663    | 0.068463  | 0.0055993 |
| erucoylcarnitine (C22:1)*                        | Lipid | Fatty Acid Metabolism(Acyl Carnitine)        | 0.0080152   | 0.81207   | 0.78977   |
| oleoylcarnitine (C18:1)                          | Lipid | Fatty Acid Metabolism(Acyl Carnitine)        | 0.67539     | 0.27478   | 0.021946  |
| stearoylcarnitine (C18)                          | Lipid | Fatty Acid Metabolism(Acyl Carnitine)        | 0.73186     | 0.18332   | 0.0055993 |
| 3,4-methylene heptanoylglycine                   | Lipid | Fatty Acid Metabolism(Acyl Glycine)          | 0.00050989  | 0.49738   | 0.6815    |
| hexanoylglycine                                  | Lipid | Fatty Acid Metabolism(Acyl Glycine)          | 0.037906    | 0.6125    | 0.71186   |
| N-linoleoylglycine                               | Lipid | Fatty Acid Metabolism(Acyl Glycine)          | 0.047741    | 0.33641   | 0.60154   |
| 2-aminoheptanoate                                | Lipid | Fatty Acid, Amino                            | 0.73423     | 0.0054704 | 0.68933   |
| 2-aminooctanoate                                 | Lipid | Fatty Acid, Amino                            | 0.77607     | 0.0051259 | 0.9313    |

|                                                      |       |                         |             |            |         |
|------------------------------------------------------|-------|-------------------------|-------------|------------|---------|
| 3-hydroxypropanoate                                  | Lipid | Fatty Acid, Monohydroxy | 0.014406    | 0.33641    | 0.80534 |
| 3-hydroxysebacate                                    | Lipid | Fatty Acid, Monohydroxy | 0.00090246  | 0.41304    | 0.58404 |
| galactosylglycerol*                                  | Lipid | Glycerolipid Metabolism | 0.70817     | 0.0015198  | 0.76958 |
| glycerol                                             | Lipid | Glycerolipid Metabolism | 0.000052173 | 0.36343    | 0.58271 |
| linolenoyl-linolenoyl-glycerol<br>(18:3/18:3) [1]*   | Lipid | Glycolipid Metabolism   | 0.0024194   | 0.36146    | 0.66425 |
| linolenoyl-linolenoyl-glycerol<br>(18:3/18:3) [2]*   | Lipid | Glycolipid Metabolism   | 0.0022964   | 0.84373    | 0.99631 |
| 3-hydroxybutyrate (BHBA)                             | Lipid | Ketone Bodies           | 0.0066988   | 0.40513    | 0.85776 |
| 10-heptadecenoate (17:1n7)                           | Lipid | Long Chain Fatty Acid   | 0.02113     | 0.54578    | 0.81072 |
| 10-nonadecenoate (19:1n9)                            | Lipid | Long Chain Fatty Acid   | 0.049189    | 0.33745    | 0.6373  |
| arachidate (20:0)                                    | Lipid | Long Chain Fatty Acid   | 0.0065931   | 0.46168    | 0.88032 |
| eicosenoate (20:1)                                   | Lipid | Long Chain Fatty Acid   | 0.028384    | 0.26373    | 0.55621 |
| palmitate (16:0)                                     | Lipid | Long Chain Fatty Acid   | 0.028204    | 0.36478    | 0.72514 |
| palmitoleate (16:1n7)                                | Lipid | Long Chain Fatty Acid   | 0.01997     | 0.65493    | 0.72514 |
| 1-linolenoyl-GPC (18:3)*                             | Lipid | Lysolipid               | 0.0036007   | 0.16818    | 0.6815  |
| 1-linoleoyl-GPE (18:2)*                              | Lipid | Lysolipid               | 0.0062092   | 0.1279     | 0.71141 |
| 1-linoleoyl-GPI (18:2)*                              | Lipid | Lysolipid               | 0.021535    | 0.30823    | 0.47788 |
| 1-oleoyl-GPE (18:1)                                  | Lipid | Lysolipid               | 0.002019    | 0.013057   | 0.41099 |
| 1-oleoyl-GPG (18:1)*                                 | Lipid | Lysolipid               | 0.028204    | 0.22996    | 0.82618 |
| 1-oleoyl-GPI (18:1)*                                 | Lipid | Lysolipid               | 0.049799    | 0.28677    | 0.55036 |
| 1-palmitoleoyl-GPC (16:1)*                           | Lipid | Lysolipid               | 0.022354    | 0.22248    | 0.71186 |
| 1-palmitoyl-GPC (16:0)                               | Lipid | Lysolipid               | 0.013372    | 0.22996    | 0.67766 |
| 1-palmitoyl-GPE (16:0)                               | Lipid | Lysolipid               | 0.0039348   | 0.0015198  | 0.38213 |
| 1-stearoyl-GPC (18:0)                                | Lipid | Lysolipid               | 0.045363    | 0.052966   | 0.67318 |
| 1-stearoyl-GPE (18:0)                                | Lipid | Lysolipid               | 0.003327    | 0.00033463 | 0.5416  |
| 2-palmitoleoyl-GPC (16:1)*                           | Lipid | Lysolipid               | 0.028384    | 0.53687    | 0.6373  |
| 1-(1-enyl-oleoyl)-2-linoleoyl-GPE (P-<br>18:1/18:2)* | Lipid | Lysoplasmalogen         | 0.003202    | 0.40513    | 0.20365 |
| 1-(1-enyl-oleoyl)-GPE (P-18:1)*                      | Lipid | Lysoplasmalogen         | 0.020868    | 0.010128   | 0.54069 |
| 1-(1-enyl-palmitoyl)-GPE (P-16:0)*                   | Lipid | Lysoplasmalogen         | 0.010031    | 0.0222     | 0.5744  |



|                                                    |       |                                        |            |           |         |
|----------------------------------------------------|-------|----------------------------------------|------------|-----------|---------|
| 1-(1-enyl-stearoyl)-GPE (P-18:0)*                  | Lipid | Lysoplasmalogen                        | 0.0036007  | 0.0059597 | 0.43668 |
| 1-linoleoylglycerol (18:2)                         | Lipid | Monoacylglycerol                       | 0.02164    | 0.70118   | 0.6815  |
| 1-oleoyl-2-linoleoyl-GPE (18:1/18:2)*              | Lipid | Phospholipid Metabolism                | 0.032064   | 0.27218   | 0.986   |
| 1-stearoyl-2-linoleoyl-GPE (18:0/18:2)*            | Lipid | Phospholipid Metabolism                | 0.00327    | 0.79543   | 0.66337 |
| 1-stearoyl-2-oleoyl-GPE (18:0/18:1)                | Lipid | Phospholipid Metabolism                | 0.012501   | 0.70847   | 0.89084 |
| 1-stearoyl-2-oleoyl-GPI (18:0/18:1)*               | Lipid | Phospholipid Metabolism                | 0.049799   | 0.84598   | 0.93714 |
| choline                                            | Lipid | Phospholipid Metabolism                | 0.0039348  | 0.92748   | 0.41099 |
| choline phosphate                                  | Lipid | Phospholipid Metabolism                | 0.0080152  | 0.5746    | 0.42003 |
| ethanolamine                                       | Lipid | Phospholipid Metabolism                | 0.0024194  | 0.017032  | 0.53721 |
| glycerophosphoethanolamine                         | Lipid | Phospholipid Metabolism                | 0.040474   | 0.39548   | 0.74534 |
| glycerophosphorylcholine (GPC)                     | Lipid | Phospholipid Metabolism                | 0.030129   | 0.87636   | 0.60154 |
| 1-(1-enyl-stearoyl)-2-linoleoyl-GPE (P-18:0/18:2)* | Lipid | Plasmalogen                            | 0.049799   | 0.33723   | 0.66425 |
| dihomo-linoleate (20:2n6)                          | Lipid | Polyunsaturated Fatty Acid (n3 and n6) | 0.038608   | 0.26373   | 0.60154 |
| dihomo-linolenate (20:3n3 or n6)                   | Lipid | Polyunsaturated Fatty Acid (n3 and n6) | 0.0094963  | 0.28318   | 0.75603 |
| docosadienoate (22:2n6)                            | Lipid | Polyunsaturated Fatty Acid (n3 and n6) | 0.019197   | 0.32337   | 0.5564  |
| linoleate (18:2n6)                                 | Lipid | Polyunsaturated Fatty Acid (n3 and n6) | 0.019472   | 0.59396   | 0.90772 |
| linolenate [alpha or gamma; (18:3n3 or 6)]         | Lipid | Polyunsaturated Fatty Acid (n3 and n6) | 0.019785   | 0.55271   | 0.90201 |
| ceramide (d14:1/18:0, d16:1/16:0)*                 | Lipid | Sphingolipid Metabolism                | 0.0026946  | 0.029911  | 0.29311 |
| myristoyl dihydrosphingomyelin (d18:0/14:0)*       | Lipid | Sphingolipid Metabolism                | 0.017255   | 0.1571    | 0.65976 |
| N-palmitoyl-sphinganine (d18:0/16:0)               | Lipid | Sphingolipid Metabolism                | 0.00090246 | 0.49937   | 0.88059 |
| palmitoyl dihydrosphingomyelin (d18:0/16:0)*       | Lipid | Sphingolipid Metabolism                | 0.028204   | 0.48717   | 0.38068 |
| palmitoyl sphingomyelin (d18:1/16:0)               | Lipid | Sphingolipid Metabolism                | 0.00041492 | 0.32924   | 0.58489 |
| sphingomyelin (d18:1/14:0, d16:1/16:0)*            | Lipid | Sphingolipid Metabolism                | 0.027646   | 0.30635   | 0.42553 |
| sphingomyelin (d18:1/15:0, d16:1/17:0)*            | Lipid | Sphingolipid Metabolism                | 0.049799   | 0.46168   | 0.91035 |
| sphingomyelin (d18:1/18:1, d18:2/18:0)             | Lipid | Sphingolipid Metabolism                | 0.035327   | 0.65986   | 0.72636 |

|                                         |             |                                            |            |            |            |
|-----------------------------------------|-------------|--------------------------------------------|------------|------------|------------|
| sphingomyelin (d18:2/14:0, d18:1/14:1)* | Lipid       | Sphingolipid Metabolism                    | 0.024106   | 0.25877    | 0.66425    |
| sphingomyelin (d18:2/16:0, d18:1/16:1)* | Lipid       | Sphingolipid Metabolism                    | 0.019472   | 0.18629    | 0.67974    |
| tetradecanoylsphingosine (d14:1)*       | Lipid       | Sphingolipid Metabolism                    | 0.96168    | 0.031401   | 0.71186    |
| 1-methyladenine                         | Nucleotide  | Purine Metabolism, Adenine containing      | 0.99161    | 0.031401   | 0.42003    |
| N1-methyladenosine                      | Nucleotide  | Purine Metabolism, Adenine containing      | 0.00013111 | 0.080883   | 0.41099    |
| guanosine                               | Nucleotide  | Purine Metabolism, Guanine containing      | 0.027646   | 0.14582    | 0.60146    |
| 3-methylcytidine                        | Nucleotide  | Pyrimidine Metabolism, Cytidine containing | 0.62496    | 0.0051996  | 0.55156    |
| pseudouridine                           | Nucleotide  | Pyrimidine Metabolism, Uracil containing   | 0.093038   | 0.0054704  | 0.66425    |
| uridine 3'-monophosphate (3'-UMP)       | Nucleotide  | Pyrimidine Metabolism, Uracil containing   | 0.017279   | 0.3653     | 0.99115    |
| glycylleucine                           | Peptide     | Dipeptide                                  | 0.35586    | 0.0222     | 0.71505    |
| histidylalanine                         | Peptide     | Dipeptide                                  | 0.89793    | 0.020615   | 0.80534    |
| isoleucylglycine                        | Peptide     | Dipeptide                                  | 0.56469    | 0.013593   | 0.76958    |
| leucylglycine                           | Peptide     | Dipeptide                                  | 0.70141    | 0.010128   | 0.65333    |
| lysylleucine                            | Peptide     | Dipeptide                                  | 0.92178    | 0.0094609  | 0.33715    |
| phenylalanylalanine                     | Peptide     | Dipeptide                                  | 0.53706    | 0.0076268  | 0.45242    |
| phenylalanylglycine                     | Peptide     | Dipeptide                                  | 0.45586    | 0.013057   | 0.55405    |
| tryptophylglycine                       | Peptide     | Dipeptide                                  | 0.99125    | 0.0056262  | 0.52419    |
| valylglycine                            | Peptide     | Dipeptide                                  | 0.55267    | 0.0059535  | 0.74319    |
| valylleucine                            | Peptide     | Dipeptide                                  | 0.91278    | 0.014055   | 0.39821    |
| gamma-glutamylglutamine                 | Peptide     | Gamma-glutamyl Amino Acid                  | 0.026578   | 0.86435    | 0.6815     |
| 4-hydroxybenzoate                       | Xenobiotics | Benzoate Metabolism                        | 0.043607   | 0.25474    | 0.41099    |
| 4-hydroxyhippurate                      | Xenobiotics | Benzoate Metabolism                        | 0.0022761  | 8.1354E-06 | 6.5492E-06 |
| methyl-4-hydroxybenzoate sulfate        | Xenobiotics | Benzoate Metabolism                        | 0.014375   | 0.014291   | 0.057052   |
| ectoine                                 | Xenobiotics | Chemical                                   | 0.77607    | 0.010128   | 0.87177    |

**Table S2.** Metabolite abundances significantly changed in flight muscle of male *Manduca sexta* across Diel Time (adjusted *P* vales) and Age (adjusted *P* vales).

| Biochemical                      | Super Pathway          | Sub Pathway                                      | Diel Time | Age         | Interaction |
|----------------------------------|------------------------|--------------------------------------------------|-----------|-------------|-------------|
| cyano-alanine                    | Amino Acid             | Alanine and Aspartate Metabolism                 | 0.70472   | 0.029397    | 0.67405     |
| carboxyethyl-GABA                | Amino Acid             | Glutamate Metabolism                             | 0.69577   | 0.013066    | 0.74498     |
| glutamate, gamma-methyl ester    | Amino Acid             | Glutamate Metabolism                             | 0.86709   | 0.013066    | 0.86846     |
| glutamine                        | Amino Acid             | Glutamate Metabolism                             | 0.7922    | 0.013066    | 0.63066     |
| glutathione, reduced (GSH)       | Amino Acid             | Glutathione Metabolism                           | 0.045249  | 0.31154     | 0.39955     |
| glycine                          | Amino Acid             | Glycine, Serine and Threonine Metabolism         | 0.027229  | 0.0001396   | 0.38885     |
| phosphothreonine                 | Amino Acid             | Glycine, Serine and Threonine Metabolism         | 0.53599   | 0.0011741   | 0.38885     |
| threonine                        | Amino Acid             | Glycine, Serine and Threonine Metabolism         | 0.57931   | 0.022578    | 0.34782     |
| 5-hydroxylysine                  | Amino Acid             | Lysine Metabolism                                | 0.85049   | 0.000008979 | 0.85004     |
| S-adenosylhomocysteine (SAH)     | Amino Acid             | Methionine, Cysteine, SAM and Taurine Metabolism | 0.5573    | 0.004749    | 0.36303     |
| S-adenosylmethionine (SAM)       | Amino Acid             | Methionine, Cysteine, SAM and Taurine Metabolism | 0.2506    | 4.2848E-06  | 0.88569     |
| S-methylcysteine sulfoxide       | Amino Acid             | Methionine, Cysteine, SAM and Taurine Metabolism | 0.87746   | 0.030348    | 0.69612     |
| 5-methylthioadenosine (MTA)      | Amino Acid             | Polyamine Metabolism                             | 0.0041035 | 0.00021528  | 0.31674     |
| N-alpha-acetyloronithine         | Amino Acid             | Urea cycle; Arginine and Proline Metabolism      | 0.44561   | 0.020832    | 0.69612     |
| N-methylproline                  | Amino Acid             | Urea cycle; Arginine and Proline Metabolism      | 0.18741   | 0.013066    | 0.5613      |
| N-acetyl-glucosamine 1-phosphate | Carbohydrate           | Aminosugar Metabolism                            | 0.94171   | 0.0024711   | 0.83192     |
| sedoheptulose                    | Carbohydrate           | Pentose Metabolism                               | 0.69984   | 0.0090891   | 0.57844     |
| biotin                           | Cofactors and Vitamins | Biotin Metabolism                                | 0.70472   | 2.1364E-06  | 0.17815     |
| alpha-lipoate                    | Cofactors and Vitamins | Lipoate Metabolism                               | 0.85049   | 0.0048537   | 0.83192     |
| phosphopantetheine               | Cofactors and Vitamins | Pantothenate and CoA Metabolism                  | 0.019195  | 0.20426     | 0.42504     |

|                                                |                        |                                              |           |             |         |
|------------------------------------------------|------------------------|----------------------------------------------|-----------|-------------|---------|
| xanthopterin                                   | Cofactors and Vitamins | Pterin Metabolism                            | 0.69573   | 0.020832    | 0.71957 |
| thiamin (Vitamin B1)                           | Cofactors and Vitamins | Thiamine Metabolism                          | 0.47247   | 0.040757    | 0.52397 |
| pyridoxal                                      | Cofactors and Vitamins | Vitamin B6 Metabolism                        | 0.18741   | 0.020832    | 0.8909  |
| pyridoxamine                                   | Cofactors and Vitamins | Vitamin B6 Metabolism                        | 0.026304  | 0.075985    | 0.82458 |
| aconitate [cis or trans]                       | Energy                 | TCA Cycle                                    | 0.027229  | 0.14597     | 0.40193 |
| citrate                                        | Energy                 | TCA Cycle                                    | 0.0072479 | 0.33152     | 0.47651 |
| isocitrate                                     | Energy                 | TCA Cycle                                    | 0.010198  | 0.3903      | 0.57063 |
| ceramide (d14:1/22:0, d16:1/20:0)*             | Lipid                  | Ceramides                                    | 0.48808   | 2.1623E-07  | 0.8481  |
| ceramide (d18:1/20:0, d16:1/22:0, d20:1/18:0)* | Lipid                  | Ceramides                                    | 0.9358    | 0.00061658  | 0.8481  |
| oleoyl ethanolamide                            | Lipid                  | Endocannabinoid                              | 0.42715   | 0.004271    | 0.4137  |
| butyrylcarnitine (C4)                          | Lipid                  | Fatty Acid Metabolism (also BCAA Metabolism) | 0.0041035 | 0.004271    | 0.14278 |
| 3-hydroxybutyrylcarnitine (1)                  | Lipid                  | Fatty Acid Metabolism(Acyl Carnitine)        | 0.49718   | 0.01547     | 0.57844 |
| 3-hydroxybutyrylcarnitine (2)                  | Lipid                  | Fatty Acid Metabolism(Acyl Carnitine)        | 0.20096   | 0.0033479   | 0.6395  |
| acetylcarnitine (C2)                           | Lipid                  | Fatty Acid Metabolism(Acyl Carnitine)        | 0.48599   | 0.033991    | 0.31674 |
| lignoceroylcarnitine (C24)*                    | Lipid                  | Fatty Acid Metabolism(Acyl Carnitine)        | 0.95497   | 0.024596    | 0.82458 |
| N-linoleoylglycine                             | Lipid                  | Fatty Acid Metabolism(Acyl Glycine)          | 0.57931   | 0.0018523   | 0.76287 |
| 2-aminoheptanoate                              | Lipid                  | Fatty Acid, Amino                            | 0.30542   | 0.000050153 | 0.38885 |
| 2-aminooctanoate                               | Lipid                  | Fatty Acid, Amino                            | 0.59286   | 0.043964    | 0.99319 |
| 2-hydroxyglutarate                             | Lipid                  | Fatty Acid, Dicarboxylate                    | 0.90944   | 0.0033647   | 0.75731 |
| 3-hydroxydecanoate                             | Lipid                  | Fatty Acid, Monohydroxy                      | 0.53599   | 0.025603    | 0.69612 |
| 3-hydroxylaurate                               | Lipid                  | Fatty Acid, Monohydroxy                      | 0.98012   | 0.034914    | 0.80904 |
| 3-hydroxysebacate                              | Lipid                  | Fatty Acid, Monohydroxy                      | 0.49498   | 0.0064107   | 0.14278 |
| galactosylglycerol*                            | Lipid                  | Glycerolipid Metabolism                      | 0.0095563 | 7.9612E-10  | 0.77924 |
| glycerol                                       | Lipid                  | Glycerolipid Metabolism                      | 0.026304  | 0.025872    | 0.14278 |

|                                           |       |                                        |          |             |         |
|-------------------------------------------|-------|----------------------------------------|----------|-------------|---------|
| 3-hydroxybutyrate (BHBA)                  | Lipid | Ketone Bodies                          | 0.60843  | 0.020832    | 0.57844 |
| behenate (22:0)*                          | Lipid | Long Chain Fatty Acid                  | 0.93222  | 0.0058157   | 0.66726 |
| margarate (17:0)                          | Lipid | Long Chain Fatty Acid                  | 0.81802  | 0.0049508   | 0.86686 |
| oleate/vaccenate (18:1)                   | Lipid | Long Chain Fatty Acid                  | 0.62332  | 0.044882    | 0.75486 |
| palmitate (16:0)                          | Lipid | Long Chain Fatty Acid                  | 0.775    | 0.011468    | 0.80076 |
| stearate (18:0)                           | Lipid | Long Chain Fatty Acid                  | 0.70275  | 0.04773     | 0.75486 |
| 1-linolenoyl-GPC (18:3)*                  | Lipid | Lysolipid                              | 0.77998  | 0.020832    | 0.44489 |
| 1-linoleoyl-GPE (18:2)*                   | Lipid | Lysolipid                              | 0.66821  | 0.044914    | 0.56582 |
| 1-palmitoyl-GPC (16:0)                    | Lipid | Lysolipid                              | 0.53918  | 0.00017892  | 0.36303 |
| 1-palmitoyl-GPE (16:0)                    | Lipid | Lysolipid                              | 0.64365  | 0.00010755  | 0.378   |
| 1-palmitoyl-GPG (16:0)*                   | Lipid | Lysolipid                              | 0.98012  | 0.0018862   | 0.36303 |
| 1-stearoyl-GPE (18:0)                     | Lipid | Lysolipid                              | 0.70046  | 0.025603    | 0.40449 |
| 2-palmitoleoyl-GPC (16:1)*                | Lipid | Lysolipid                              | 0.70472  | 0.0075848   | 0.77109 |
| 2-palmitoyl-GPC (16:0)*                   | Lipid | Lysolipid                              | 0.98037  | 0.0019504   | 0.378   |
| 1-(1-enyl-oleoyl)-GPE (P-18:1)*           | Lipid | Lysoplasmalogen                        | 0.80133  | 0.01315     | 0.36303 |
| 1-stearoyl-2-oleoyl-GPS (18:0/18:1)       | Lipid | Phosphatidylserine (PS)                | 0.7066   | 0.004271    | 0.31674 |
| 1-palmitoyl-2-linolenoyl-GPG (16:0/18:3)* | Lipid | Phospholipid Metabolism                | 0.016755 | 0.0095203   | 0.54553 |
| 1-palmitoyl-2-linoleoyl-GPC (16:0/18:2)   | Lipid | Phospholipid Metabolism                | 0.2436   | 0.0041445   | 0.42504 |
| 1-palmitoyl-2-linoleoyl-GPE (16:0/18:2)   | Lipid | Phospholipid Metabolism                | 0.15233  | 3.4916E-07  | 0.378   |
| 1-palmitoyl-2-linoleoyl-GPG (16:0/18:2)   | Lipid | Phospholipid Metabolism                | 0.049153 | 0.96333     | 0.60866 |
| 1-palmitoyl-2-oleoyl-GPC (16:0/18:1)      | Lipid | Phospholipid Metabolism                | 0.13778  | 0.00060588  | 0.31674 |
| 1-palmitoyl-2-oleoyl-GPE (16:0/18:1)      | Lipid | Phospholipid Metabolism                | 0.13778  | 0.000008979 | 0.34297 |
| 1-stearoyl-2-arachidonoyl-GPE (18:0/20:4) | Lipid | Phospholipid Metabolism                | 0.5573   | 0.013066    | 0.81041 |
| choline phosphate                         | Lipid | Phospholipid Metabolism                | 0.95497  | 0.0041808   | 0.14278 |
| docosadienoate (22:2n6)                   | Lipid | Polyunsaturated Fatty Acid (n3 and n6) | 0.62332  | 0.020832    | 0.31674 |
| linoleate (18:2n6)                        | Lipid | Polyunsaturated Fatty Acid (n3 and n6) | 0.70472  | 0.04773     | 0.57844 |

|                                                     |            |                                                      |          |             |         |
|-----------------------------------------------------|------------|------------------------------------------------------|----------|-------------|---------|
| linolenate [alpha or gamma; (18:3n3 or 6)]          | Lipid      | Polyunsaturated Fatty Acid (n3 and n6)               | 0.65445  | 0.020832    | 0.57063 |
| ceramide (d14:1/18:0, d16:1/16:0)*                  | Lipid      | Sphingolipid Metabolism                              | 0.27788  | 0.0075848   | 0.56582 |
| hexadecasphinganine (d16:0)*                        | Lipid      | Sphingolipid Metabolism                              | 0.63574  | 0.019366    | 0.66159 |
| N-arachidoyl-tetradecanoylsphingosine (d14:1/20:0)* | Lipid      | Sphingolipid Metabolism                              | 0.93297  | 0.0075375   | 0.95785 |
| N-behenoyl-tetradecanoylsphinganine (d14:0/22:0)*   | Lipid      | Sphingolipid Metabolism                              | 0.84515  | 0.024793    | 0.49189 |
| N-stearoyl-hexadecasphingosine (d17:1/18:0)*        | Lipid      | Sphingolipid Metabolism                              | 0.17735  | 0.00014716  | 0.40035 |
| tetradecasphinganine (d14:0)*                       | Lipid      | Sphingolipid Metabolism                              | 0.026304 | 0.013066    | 0.40035 |
| methylphosphate                                     | Nucleotide | Purine and Pyrimidine Metabolism                     | 0.037617 | 0.049034    | 0.42504 |
| inosine 5'-monophosphate (IMP)                      | Nucleotide | Purine Metabolism, (Hypo)Xanthine/Inosine containing | 0.30587  | 0.00079954  | 0.14278 |
| N1-methylinosine                                    | Nucleotide | Purine Metabolism, (Hypo)Xanthine/Inosine containing | 0.5573   | 0.030348    | 0.72223 |
| 2'-deoxyadenosine                                   | Nucleotide | Purine Metabolism, Adenine containing                | 0.22802  | 0.00064937  | 0.49189 |
| adenosine                                           | Nucleotide | Purine Metabolism, Adenine containing                | 0.65445  | 0.00064937  | 0.57844 |
| N1-methyladenosine                                  | Nucleotide | Purine Metabolism, Adenine containing                | 0.049153 | 0.000058595 | 0.36303 |
| guanosine                                           | Nucleotide | Purine Metabolism, Guanine containing                | 0.18741  | 0.000026902 | 0.18462 |
| guanosine 5'- monophosphate (5'-GMP)                | Nucleotide | Purine Metabolism, Guanine containing                | 0.015708 | 0.075985    | 0.14278 |
| 3-methylcytidine                                    | Nucleotide | Pyrimidine Metabolism, Cytidine containing           | 0.23601  | 0.00098419  | 0.14278 |
| 3-aminoisobutyrate                                  | Nucleotide | Pyrimidine Metabolism, Thymine containing            | 0.24017  | 3.3411E-07  | 0.57844 |
| 5-methyluridine (ribothymidine)                     | Nucleotide | Pyrimidine Metabolism, Uracil containing             | 0.93222  | 0.0033647   | 0.77109 |
| beta-alanine                                        | Nucleotide | Pyrimidine Metabolism, Uracil containing             | 0.84212  | 0.00014716  | 0.69612 |
| N3-methyluridine                                    | Nucleotide | Pyrimidine Metabolism, Uracil containing             | 0.69984  | 0.0064454   | 0.73469 |

|                                   |             |                                          |         |             |         |
|-----------------------------------|-------------|------------------------------------------|---------|-------------|---------|
| pseudouridine                     | Nucleotide  | Pyrimidine Metabolism, Uracil containing | 0.94757 | 5.8399E-06  | 0.85202 |
| uridine 3'-monophosphate (3'-UMP) | Nucleotide  | Pyrimidine Metabolism, Uracil containing | 0.30542 | 0.000012431 | 0.57844 |
| 4-hydroxyhippurate                | Xenobiotics | Benzoate Metabolism                      | 0.35482 | 0.034197    | 0.34782 |

---
